# Supplementary material for: New Polymer Syntheses Part 57: Thermally Stable New Ferrocene‐Polyazomethines, Synthetic Methodology, and Characterization
Source: Hindawi journal article supplement (doi:10.1155/2013/198652), 2013-01-01
Supplement: f1 [file 198652.f1.doc]

**Supplementary information**

**New Polymer Syntheses Part 56: Thermally Stable New Ferrocene-Polyazomethines, Synthetic Methodology and Characterization**

**Authors:**

Mona Ahmed Abdel-Rahmana*, Mahmoud Ali Hussein a,b, Kamal Ibrahim Aly, Abdelwareth Abdel-Haleam Sarhan a

aChemistry Department, Polymer Lab. 122, Faculty of Science, Assiut University, PB 71516, Assiut, Egypt.

b Chemistry Department, Faculty of Science, King Abdulaziz University, P.O.Box 80203, Jeddah 21589, Saudi Arabia

*Corresponding author. E-mail: [manoush00@yahoo.com](mailto:manoush00@yahoo.com).

Fax 002 088 2342708.

Table of contents:

- CV curves of
  - Monomer and model compounds, fig S1- fig S2.
- CV curves of
  - Polymers , fig S3- fig S7.
  - Collection fig. S8.

**Contents**

| **Figure S1:** CV curve of Fc- Polyazomethine **6a** | S1 |
| --- | --- |
| **Figure S2:** CV curve of Fc- Polyazomethine **6a** | S2 |
| **Figure S3:** CV curve of Fc- Polyazomethine **6a** | S3 |
| **Figure S4:** CV curve of Fc- Polyazomethine **6b** | S4 |
| **Figure S5:** CV curve of Fc- Polyazomethine **6c** | S5 |
| **Figure S6:** CV curve of Fc- Polyazomethine **6d** | S6 |
| **Figure S7:** CV curve of Fc- Polyazomethine **6e** | S7 |
| **Figure S8:** Cyclic voltammetry (CV) of compound **4** and Fe-polyazomethines **6a-e** at scan rate at 20 mVs-1. | S8 |

**Figure S1:** CV curve of monomer compound **4**

**Figure S2:** CV curve of model compound **5**

**Figure S3:** CV curve of Fc- Polyazomethine **6a**

**Figure S4:** CV curve of Fc- Polyazomethine **6b**

**Figure S5:** CV curve of Fc- Polyazomethine **6c**

**Figure S6:** CV curve of Fc- Polyazomethine **6d**

**Figure S7:** CV curve of Fc- Polyazomethine **6e**


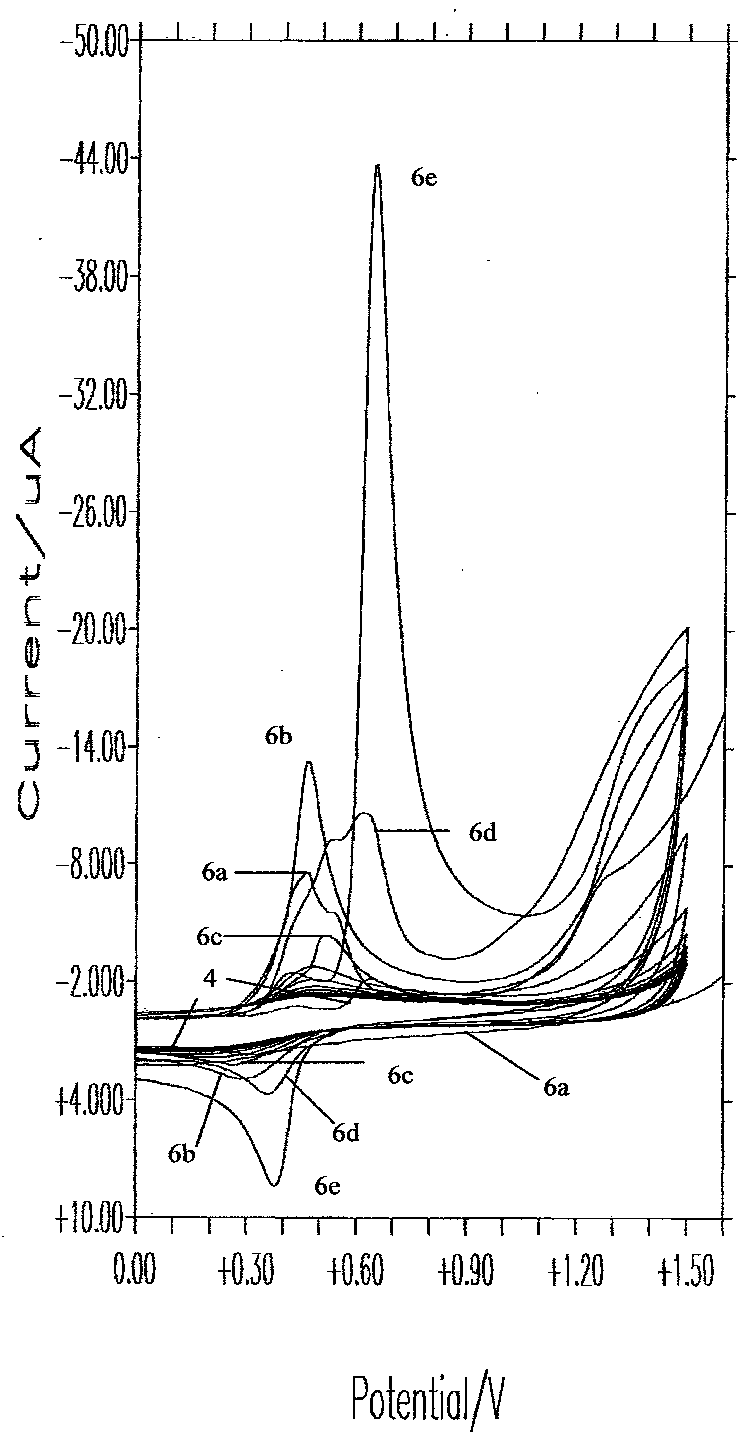


**Figure S8:** Cyclic voltammetry (CV) of compound **4** and Fe-polyazomethines **6a-e** at scan rate at 20 mVs-1.
